# Supplementary material for: Successful prednisolone or calcimimetic treatment of acquired hypocalciuric hypercalcemia caused by biased allosteric CaSR autoantibodies
Source: JCI journal article supplement (doi:10.1172/jci.insight.156742), 2022-09-19
Supplement: sd1 [file 1]

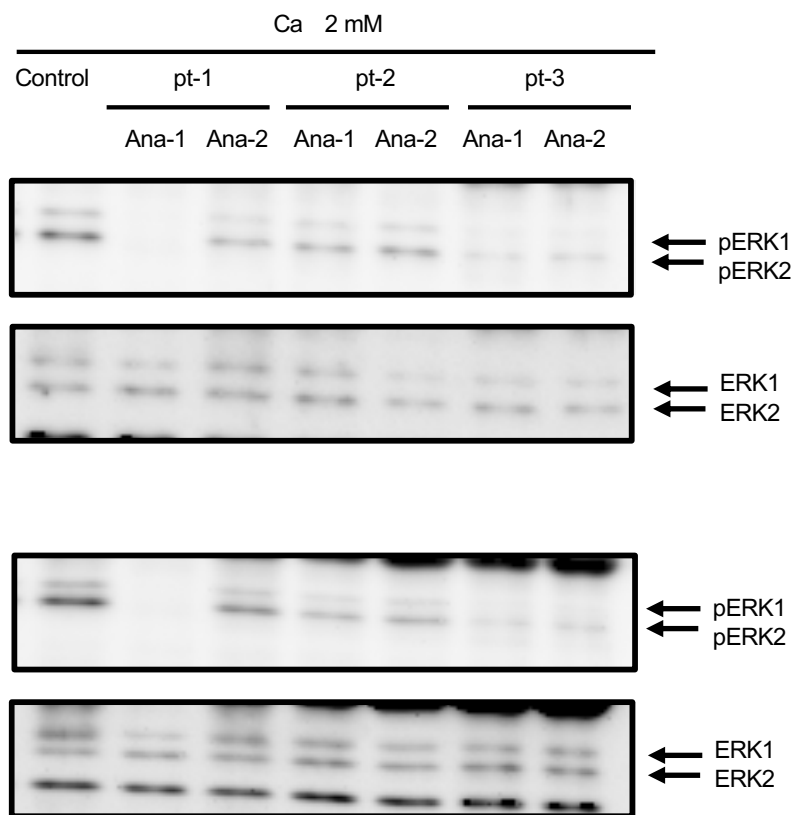

**Supplementary Figure 1. Immunoblotting of pERK1/2 and ERK1/2 in cells exposed to 2.0 mM Ca with the co-administration of the AHH patients' IgG at two timepoints**

HEK293 cells stably expressing human CaSR were exposed to 2 mg/dL of AHH patients' IgG, and stimulated with 2.0 mM Ca. The phosphorylation of ERK1/2 was detected by immunoblotting, and each ERK1/2 was detected by reblotting of the same membrane.
